# Supplementary material for: Integration of MRI radiomics and germline genetics to predict the IDH mutation status of gliomas
Source: bioRxiv or medRxiv preprint supplement (doi:10.1101/2024.07.16.24310519), 2025-04-18
Supplement: Supplementary file [file media-1.pdf]

## **Integration of MRI radiomics and germline genetics to predict the IDH mutation status of gliomas**

Taishi Nakase<sup>1</sup>, Stephen S. Francis<sup>2,3,4</sup>, Geno Guerra<sup>2</sup>, Qingyu Zhao<sup>5</sup>, Linda Kachuri<sup>1,6</sup>

### **Affiliations:**

1. Department of Epidemiology and Population Health, Stanford University School of Medicine, Stanford, CA
2. Department of Neurological Surgery, University of California San Francisco, San Francisco, CA
3. Department of Epidemiology and Biostatistics, University of California San Francisco, San Francisco, CA
4. Weill Institute for Neurosciences, University of California San Francisco, San Francisco, CA
5. Department of Radiology, Weill Cornell Medicine, New York, NY
6. Stanford Cancer Institute, Stanford University School of Medicine, Stanford, CA

### **Corresponding author:**

Linda Kachuri, PhD

Department of Epidemiology and Population Health

Stanford University School of Medicine

300 Pasteur Drive, Alway Building, Room 105A, Stanford, CA 94305

Email: [lkachuri@stanford.edu](mailto:lkachuri@stanford.edu)

Telephone: (650) 723-9384

**Supplementary Figure 1: Distribution of AUC for classification of IDH mutation status from repeated 5-fold cross-validation using radiomics features unadjusted for potential confounding factors.** AUC estimates from 500 random iterations of 5-fold cross validation were obtained from IDH classification models using different combinations of features.

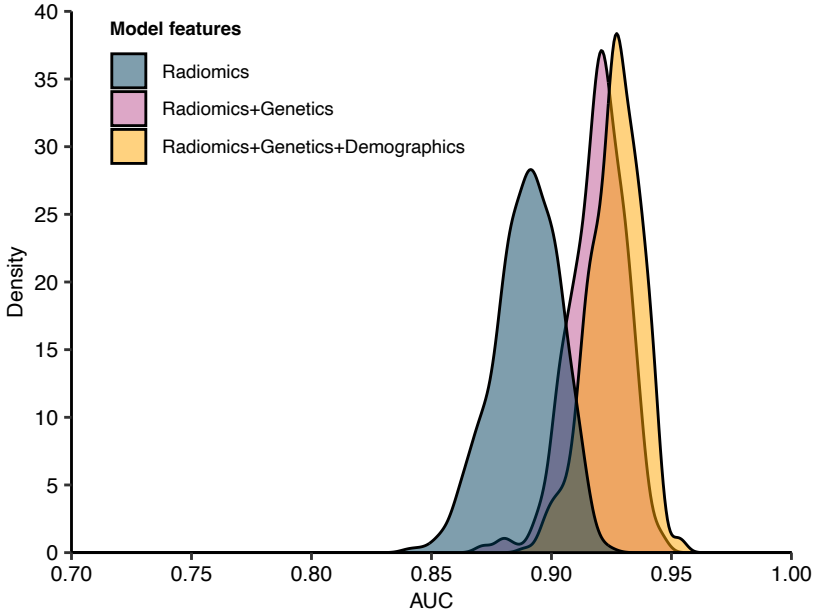

**Supplementary Table 1: Classification performance for IDH mutation status using radiomics features unadjusted for potential confounding factors.** Performance metrics are based on classification models for *IDH* mutation status in glioma cases. Models with radiomic features were trained with an elastic net; otherwise, models were trained with logistic regression. Two-sided p-values ( $P_{\Delta AUC}$ ) testing the differences in AUC between the radiomics-based model and other models are based on DeLong's test.

| <b>Model features</b>               | <b>Accuracy</b> | <b>Precision</b> | <b>Recall</b> | <b>F1-score</b> | <b>AUC (95% CI)</b>  | <b><math>P_{\Delta AUC}</math></b> |
|-------------------------------------|-----------------|------------------|---------------|-----------------|----------------------|------------------------------------|
| Radiomics                           | 0.830           | 0.868            | 0.766         | 0.814           | 0.887 (0.833, 0.942) | -                                  |
| Demographics                        | 0.711           | 0.844            | 0.494         | 0.623           | 0.751 (0.673, 0.829) | 0.0034                             |
| Genetics                            | 0.623           | 0.631            | 0.532         | 0.577           | 0.702 (0.622, 0.782) | $5.1 \times 10^{-4}$               |
| Genetics + Demographics             | 0.711           | 0.804            | 0.532         | 0.641           | 0.775 (0.701, 0.849) | 0.019                              |
| Radiomics + Demographics            | 0.836           | 0.840            | 0.818         | 0.829           | 0.892 (0.839, 0.946) | 0.78                               |
| Radiomics + Genetics                | 0.843           | 0.861            | 0.805         | 0.832           | 0.920 (0.878, 0.962) | 0.018                              |
| Radiomics + Genetics + Demographics | 0.868           | 0.868            | 0.857         | 0.863           | 0.920 (0.878, 0.963) | 0.060                              |

**Supplementary Table 2: Feature association with overall survival.** Features used for IDH status classification are examined for association with overall survival using univariate Cox proportional hazards regression.

| Feature                       | Feature category              | HR (95% CI)      | P value  |
|-------------------------------|-------------------------------|------------------|----------|
| Age at Diagnosis              | Demographic                   | 2.62 (1.94-3.53) | 3.40E-10 |
| Germline Genetics             | Genetic                       | 0.84 (0.66-1.07) | 0.15     |
| NET T1Gd Bin 10               | Radiomic - Histogram          | 1.34 (1.12-1.60) | 0.0014   |
| NET FLAIR Bin 4               | Radiomic - Histogram          | 1.06 (0.85-1.33) | 0.6      |
| NET T1Gd Bin 1                | Radiomic - Histogram          | 1.02 (0.81-1.28) | 0.85     |
| NET T1 Bin 1                  | Radiomic - Histogram          | 1.00 (0.76-1.30) | 0.98     |
| NET T1 Bin 7                  | Radiomic - Histogram          | 0.96 (0.77-1.20) | 0.72     |
| NET T1Gd Bin 6                | Radiomic - Histogram          | 0.94 (0.74-1.21) | 0.65     |
| NET T1Gd Bin 3                | Radiomic - Histogram          | 0.91 (0.72-1.16) | 0.45     |
| NET T1Gd Bin 5                | Radiomic - Histogram          | 0.75 (0.57-0.99) | 0.043    |
| Mean NET T1Gd                 | Radiomic - Intensity          | 1.42 (1.12-1.80) | 0.004    |
| Mean NET T1                   | Radiomic - Intensity          | 1.33 (1.05-1.68) | 0.019    |
| STD NET T1Gd                  | Radiomic - Intensity          | 0.96 (0.75-1.23) | 0.77     |
| Parietal                      | Radiomic - Spatial            | 1.12 (0.91-1.37) | 0.29     |
| Frontal                       | Radiomic - Spatial            | 0.73 (0.57-0.94) | 0.016    |
| GLOBAL NET FLAIR Kurtosis     | Radiomic - Texture            | 1.32 (1.09-1.60) | 0.0039   |
| GLCM NET T1 Correlation       | Radiomic - Texture            | 1.28 (0.92-1.78) | 0.15     |
| GLSZM NET FLAIR SZLGE         | Radiomic - Texture            | 1.27 (1.03-1.56) | 0.028    |
| GLRLM NET T2 SRE              | Radiomic - Texture            | 1.20 (0.95-1.51) | 0.13     |
| GLOBAL NET T2 Kurtosis        | Radiomic - Texture            | 1.11 (0.89-1.38) | 0.37     |
| GLOBAL NET FLAIR Skewness     | Radiomic - Texture            | 1.00 (0.76-1.30) | 0.98     |
| GLCM NET T2 Homogeneity       | Radiomic - Texture            | 0.94 (0.75-1.16) | 0.55     |
| GLOBAL NET FLAIR Variance     | Radiomic - Texture            | 0.77 (0.63-0.93) | 0.0059   |
| NGTDM NET T1Gd Busyness       | Radiomic - Texture            | 0.75 (0.55-1.02) | 0.069    |
| GLCM NET T1Gd AutoCorrelation | Radiomic - Texture            | 0.74 (0.59-0.94) | 0.013    |
| GLCM NET T1Gd SumAverage      | Radiomic - Texture            | 0.74 (0.59-0.92) | 0.0081   |
| NGTDM NET FLAIR Busyness      | Radiomic - Texture            | 0.73 (0.56-0.97) | 0.028    |
| GLCM NET FLAIR Variance       | Radiomic - Texture            | 0.73 (0.58-0.91) | 0.0052   |
| GLCM NET T1 Contrast          | Radiomic - Texture            | 0.71 (0.52-0.95) | 0.021    |
| NGTDM NET T1 Contrast         | Radiomic - Texture            | 0.70 (0.52-0.93) | 0.013    |
| NGTDM NET T1 Busyness         | Radiomic - Texture            | 0.56 (0.40-0.80) | 0.0015   |
| GLSZM NET T1 LZLGE            | Radiomic - Texture            | 0.44 (0.27-0.72) | 0.0011   |
| ET/TC                         | Radiomic - Volumetric         | 1.51 (1.22-1.86) | 1.20E-04 |
| ET/WT                         | Radiomic - Volumetric         | 1.28 (1.07-1.54) | 0.0068   |
| NET/BRAIN                     | Radiomic - Volumetric         | 0.70 (0.52-0.93) | 0.016    |
| NET/TC                        | Radiomic - Volumetric         | 0.66 (0.54-0.82) | 1.20E-04 |
| NET/WT                        | Radiomic - Volumetric         | 0.64 (0.49-0.83) | 7.80E-04 |
| SOLIDITY NET                  | Radiomic - Volumetric         | 0.61 (0.49-0.77) | 3.10E-05 |
| Center of gravity (y-axis)    | Radiomic - Tumor Growth Model | 1.31 (1.03-1.65) | 0.027    |
| Diffusion coefficient         | Radiomic - Tumor Growth Model | 0.99 (0.76-1.28) | 0.92     |

**Abbreviations**

- NET Non-enhancing tumor
- WT Whole tumor
- TC Tumor core
- ET Enhancing tumor
- GLCM Grey-level co-occurrence matrix
- GLSZM Gray-level size zone matrix
- GLRLM Gray-level run-length matrix
- SZLGE Small zone low gray-level emphasis
- SRE Short run emphasis
- NGTDM Neighborhood grey-tone difference matrix
